# Supplementary material
Source: publisher site journal article supplement (https://www.spandidos-publications.com/6126/downloadSupplementary)
Supplement: Supplementary file 1 [file downloadSupplementary]

## Sheet: Supplementary Table S4
Table SV. MRNA-miRNA.
No.	mRNA	miRNA
1	SOX9	hsa-miR-8485
2	SOX9	hsa-miR-136-5p
3	SOX9	hsa-miR-499a-5p
4	SOX9	hsa-miR-514a-5p
5	SOX9	hsa-miR-588
6	SOX9	hsa-miR-4306
7	SOX9	hsa-miR-4672
8	SOX9	hsa-miR-5011-5p
9	SOX9	hsa-miR-5195-3p
10	SOX9	hsa-miR-6795-3p
11	SOX9	hsa-miR-6883-5p
12	SMAD2	hsa-miR-6504-5p
13	SMAD2	hsa-miR-4494
14	SMAD2	hsa-miR-33a-3p
15	SMAD2	hsa-miR-548az-5p
16	SMAD2	hsa-miR-4727-5p
17	SMAD2	hsa-miR-139-5p
18	SMAD2	hsa-miR-548ba
19	SMAD2	hsa-miR-181b-5p
20	SMAD2	hsa-miR-152-3p
21	SMAD2	hsa-miR-340-5p
22	SMAD2	hsa-miR-520d-3p
23	SMAD2	hsa-miR-522-3p
24	SMAD2	hsa-miR-551b-5p
25	SMAD2	hsa-miR-1276
26	SMAD2	hsa-miR-5584-5p
27	SMAD2	hsa-miR-208a-5p
28	SMAD2	hsa-miR-148a-3p
29	SMAD2	hsa-miR-216a-3p
30	SMAD2	hsa-miR-125a-5p
31	SMAD2	hsa-miR-148b-3p
32	SMAD2	hsa-miR-409-3p
33	SMAD2	hsa-miR-769-5p
34	SMAD2	hsa-miR-888-5p
35	SMAD2	hsa-miR-1244
36	SMAD2	hsa-miR-1248
37	SMAD2	hsa-miR-3121-3p
38	SMAD2	hsa-miR-3919
39	SMAD2	hsa-miR-4496
40	SMAD2	hsa-miR-4511
41	SMAD2	hsa-miR-4533
42	SMAD2	hsa-miR-4728-5p
43	SMAD2	hsa-miR-4773
44	SMAD2	hsa-miR-5692a
45	SMAD2	hsa-miR-6736-3p
46	SMAD2	hsa-miR-6831-5p
47	SMAD2	hsa-let-7f-5p
48	SMAD2	hsa-miR-148a-5p
49	SMAD2	hsa-miR-7-5p
50	SMAD2	hsa-miR-10a-5p
51	SMAD2	hsa-miR-140-5p
52	SMAD2	hsa-miR-362-3p
53	SMAD2	hsa-miR-302d-5p
54	SMAD2	hsa-miR-647
55	SMAD2	hsa-miR-1264
56	SMAD2	hsa-miR-1243
57	SMAD2	hsa-miR-4319
58	SMAD2	hsa-miR-4427
59	SMAD2	hsa-miR-4670-3p
60	SMAD2	hsa-miR-4753-3p
61	SMAD2	hsa-miR-4436b-5p
62	SMAD2	hsa-miR-365a-5p
63	SMAD2	hsa-miR-135b-5p
64	SMAD2	hsa-miR-485-5p
65	SMAD2	hsa-miR-519c-5p
66	SMAD2	hsa-miR-519b-5p
67	SMAD2	hsa-miR-523-5p
68	SMAD2	hsa-miR-518f-5p
69	SMAD2	hsa-miR-526a-5p
70	SMAD2	hsa-miR-520c-5p
71	SMAD2	hsa-miR-518e-5p
72	SMAD2	hsa-miR-518d-5p
73	SMAD2	hsa-miR-522-5p
74	SMAD2	hsa-miR-519a-5p
75	SMAD2	hsa-miR-3978
76	SMAD2	hsa-miR-5582-3p
77	SMAD2	hsa-miR-7158-5p
78	SMAD2	hsa-miR-7705
79	SMAD2	hsa-miR-8055
80	SMAD2	hsa-let-7a-5p
81	SMAD2	hsa-let-7b-5p
82	SMAD2	hsa-let-7c-5p
83	SMAD2	hsa-let-7d-5p
84	SMAD2	hsa-let-7e-5p
85	SMAD2	hsa-miR-18a-5p
86	SMAD2	hsa-miR-27a-3p
87	SMAD2	hsa-miR-31-3p
88	SMAD2	hsa-miR-103a-2-5p
89	SMAD2	hsa-miR-129-5p
90	SMAD2	hsa-miR-30c-2-3p
91	SMAD2	hsa-miR-30d-3p
92	SMAD2	hsa-miR-183-5p
93	SMAD2	hsa-miR-205-5p
94	SMAD2	hsa-miR-212-3p
95	SMAD2	hsa-miR-219a-5p
96	SMAD2	hsa-miR-200b-3p
97	SMAD2	hsa-let-7g-5p
98	SMAD2	hsa-let-7i-5p
99	SMAD2	hsa-miR-27b-3p
100	SMAD2	hsa-miR-30b-5p
101	SMAD2	hsa-miR-125b-5p
102	SMAD2	hsa-miR-135a-5p
103	SMAD2	hsa-miR-141-3p
104	SMAD2	hsa-miR-125a-3p
105	SMAD2	hsa-miR-149-5p
106	SMAD2	hsa-miR-206
107	SMAD2	hsa-miR-320a-5p
108	SMAD2	hsa-miR-155-5p
109	SMAD2	hsa-miR-30c-1-3p
110	SMAD2	hsa-miR-200a-3p
111	SMAD2	hsa-miR-302a-3p
112	SMAD2	hsa-miR-361-5p
113	SMAD2	hsa-miR-361-3p
114	SMAD2	hsa-miR-365b-5p
115	SMAD2	hsa-miR-302b-3p
116	SMAD2	hsa-miR-302c-3p
117	SMAD2	hsa-miR-302d-3p
118	SMAD2	hsa-miR-373-5p
119	SMAD2	hsa-miR-373-3p
120	SMAD2	hsa-miR-324-3p
121	SMAD2	hsa-miR-18b-5p
122	SMAD2	hsa-miR-433-3p
123	SMAD2	hsa-miR-329-3p
124	SMAD2	hsa-miR-452-5p
125	SMAD2	hsa-miR-486-5p
126	SMAD2	hsa-miR-497-3p
127	SMAD2	hsa-miR-512-3p
128	SMAD2	hsa-miR-498-3p
129	SMAD2	hsa-miR-520e-5p
130	SMAD2	hsa-miR-520e-3p
131	SMAD2	hsa-miR-520a-3p
132	SMAD2	hsa-miR-524-5p
133	SMAD2	hsa-miR-513a-5p
134	SMAD2	hsa-miR-513a-3p
135	SMAD2	hsa-miR-455-3p
136	SMAD2	hsa-miR-561-5p
137	SMAD2	hsa-miR-577
138	SMAD2	hsa-miR-582-3p
139	SMAD2	hsa-miR-583
140	SMAD2	hsa-miR-548b-5p
141	SMAD2	hsa-miR-607
142	SMAD2	hsa-miR-613
143	SMAD2	hsa-miR-617
144	SMAD2	hsa-miR-624-5p
145	SMAD2	hsa-miR-641
146	SMAD2	hsa-miR-652-5p
147	SMAD2	hsa-miR-767-3p
148	SMAD2	hsa-miR-1323
149	SMAD2	hsa-miR-670-3p
150	SMAD2	hsa-miR-298
151	SMAD2	hsa-miR-450b-5p
152	SMAD2	hsa-miR-543
153	SMAD2	hsa-miR-374b-3p
154	SMAD2	hsa-miR-1183
155	SMAD2	hsa-miR-1228-3p
156	SMAD2	hsa-miR-1237-3p
157	SMAD2	hsa-miR-1302
158	SMAD2	hsa-miR-548o-3p
159	SMAD2	hsa-miR-1279
160	SMAD2	hsa-miR-513c-5p
161	SMAD2	hsa-miR-513c-3p
162	SMAD2	hsa-miR-1910-3p
163	SMAD2	hsa-miR-2053
164	SMAD2	hsa-miR-2115-3p
165	SMAD2	hsa-miR-3122
166	SMAD2	hsa-miR-544b
167	SMAD2	hsa-miR-548t-5p
168	SMAD2	hsa-miR-548t-3p
169	SMAD2	hsa-miR-3148
170	SMAD2	hsa-miR-3153
171	SMAD2	hsa-miR-3163
172	SMAD2	hsa-miR-3184-3p
173	SMAD2	hsa-miR-3185
174	SMAD2	hsa-miR-3188
175	SMAD2	hsa-miR-3189-3p
176	SMAD2	hsa-miR-3190-3p
177	SMAD2	hsa-miR-514b-5p
178	SMAD2	hsa-miR-4305
179	SMAD2	hsa-miR-4262
180	SMAD2	hsa-miR-4330
181	SMAD2	hsa-miR-3617-5p
182	SMAD2	hsa-miR-3680-3p
183	SMAD2	hsa-miR-3681-3p
184	SMAD2	hsa-miR-3692-3p
185	SMAD2	hsa-miR-3714
186	SMAD2	hsa-miR-3913-3p
187	SMAD2	hsa-miR-3927-3p
188	SMAD2	hsa-miR-548y
189	SMAD2	hsa-miR-3941
190	SMAD2	hsa-miR-3945
191	SMAD2	hsa-miR-548aa
192	SMAD2	hsa-miR-4436a
193	SMAD2	hsa-miR-548ae-3p
194	SMAD2	hsa-miR-548ah-3p
195	SMAD2	hsa-miR-4457
196	SMAD2	hsa-miR-4458
197	SMAD2	hsa-miR-4470
198	SMAD2	hsa-miR-4491
199	SMAD2	hsa-miR-3973
200	SMAD2	hsa-miR-3974
201	SMAD2	hsa-miR-3975
202	SMAD2	hsa-miR-4633-5p
203	SMAD2	hsa-miR-4657
204	SMAD2	hsa-miR-4658
205	SMAD2	hsa-miR-4676-3p
206	SMAD2	hsa-miR-4686
207	SMAD2	hsa-miR-4693-5p
208	SMAD2	hsa-miR-4717-5p
209	SMAD2	hsa-miR-4724-5p
210	SMAD2	hsa-miR-4724-3p
211	SMAD2	hsa-miR-4735-5p
212	SMAD2	hsa-miR-3064-5p
213	SMAD2	hsa-miR-4753-5p
214	SMAD2	hsa-miR-371b-5p
215	SMAD2	hsa-miR-4761-5p
216	SMAD2	hsa-miR-4761-3p
217	SMAD2	hsa-miR-4768-5p
218	SMAD2	hsa-miR-2467-5p
219	SMAD2	hsa-miR-4786-5p
220	SMAD2	hsa-miR-4789-5p
221	SMAD2	hsa-miR-4799-5p
222	SMAD2	hsa-miR-5000-3p
223	SMAD2	hsa-miR-5002-5p
224	SMAD2	hsa-miR-5003-3p
225	SMAD2	hsa-miR-5195-3p
226	SMAD2	hsa-miR-548aq-5p
227	SMAD2	hsa-miR-5590-3p
228	SMAD2	hsa-miR-548av-3p
229	SMAD2	hsa-miR-5680
230	SMAD2	hsa-miR-5693
231	SMAD2	hsa-miR-6074
232	SMAD2	hsa-miR-6083
233	SMAD2	hsa-miR-6124
234	SMAD2	hsa-miR-6134
235	SMAD2	hsa-miR-6501-3p
236	SMAD2	hsa-miR-6511a-5p
237	SMAD2	hsa-miR-6513-3p
238	SMAD2	hsa-miR-6515-5p
239	SMAD2	hsa-miR-6716-5p
240	SMAD2	hsa-miR-892c-3p
241	SMAD2	hsa-miR-6730-5p
242	SMAD2	hsa-miR-6731-5p
243	SMAD2	hsa-miR-6733-5p
244	SMAD2	hsa-miR-6766-3p
245	SMAD2	hsa-miR-6776-3p
246	SMAD2	hsa-miR-6785-5p
247	SMAD2	hsa-miR-6788-5p
248	SMAD2	hsa-miR-6790-5p
249	SMAD2	hsa-miR-6792-5p
250	SMAD2	hsa-miR-6807-5p
251	SMAD2	hsa-miR-6833-3p
252	SMAD2	hsa-miR-6835-3p
253	SMAD2	hsa-miR-6839-3p
254	SMAD2	hsa-miR-6868-3p
255	SMAD2	hsa-miR-6875-3p
256	SMAD2	hsa-miR-6878-5p
257	SMAD2	hsa-miR-6881-3p
258	SMAD2	hsa-miR-6884-5p
259	SMAD2	hsa-miR-6884-3p
260	SMAD2	hsa-miR-6892-3p
261	SMAD2	hsa-miR-7151-5p
262	SMAD2	hsa-miR-7157-5p
263	SMAD2	hsa-miR-7161-5p
264	SMAD2	hsa-miR-7159-5p
265	SMAD2	hsa-miR-7849-3p
266	SMAD2	hsa-miR-7850-5p
267	SMAD2	hsa-miR-8068
268	SMAD2	hsa-miR-8085
269	SMAD2	hsa-miR-8485
270	SMAD2	hsa-miR-9500
271	SMAD2	hsa-miR-9902
272	SMAD2	hsa-miR-12124
273	GSK3B	hsa-miR-4284
274	GSK3B	hsa-miR-3646
275	GSK3B	hsa-miR-6771-3p
276	GSK3B	hsa-miR-6852-3p
277	GSK3B	hsa-let-7g-3p
278	GSK3B	hsa-miR-7111-3p
279	GSK3B	hsa-miR-346
280	GSK3B	hsa-miR-6858-5p
281	GSK3B	hsa-let-7b-3p
282	GSK3B	hsa-miR-24-3p
283	GSK3B	hsa-miR-99a-3p
284	GSK3B	hsa-miR-7-1-3p
285	GSK3B	hsa-miR-214-3p
286	GSK3B	hsa-miR-23b-3p
287	GSK3B	hsa-miR-30b-3p
288	GSK3B	hsa-miR-128-3p
289	GSK3B	hsa-miR-185-5p
290	GSK3B	hsa-miR-30c-1-3p
291	GSK3B	hsa-miR-507
292	GSK3B	hsa-miR-548b-3p
293	GSK3B	hsa-miR-550a-5p
294	GSK3B	hsa-miR-631
295	GSK3B	hsa-miR-641
296	GSK3B	hsa-miR-766-5p
297	GSK3B	hsa-miR-300
298	GSK3B	hsa-miR-1236-5p
299	GSK3B	hsa-miR-1286
300	GSK3B	hsa-miR-1260a
301	GSK3B	hsa-miR-1827
302	GSK3B	hsa-miR-2682-5p
303	GSK3B	hsa-miR-3158-3p
304	GSK3B	hsa-miR-3175
305	GSK3B	hsa-miR-3177-5p
306	GSK3B	hsa-miR-3190-3p
307	GSK3B	hsa-miR-3202
308	GSK3B	hsa-miR-4306
309	GSK3B	hsa-miR-4291
310	GSK3B	hsa-miR-3661
311	GSK3B	hsa-miR-3667-5p
312	GSK3B	hsa-miR-3909
313	GSK3B	hsa-miR-374c-5p
314	GSK3B	hsa-miR-4438
315	GSK3B	hsa-miR-4440
316	GSK3B	hsa-miR-4441
317	GSK3B	hsa-miR-4464
318	GSK3B	hsa-miR-4472
319	GSK3B	hsa-miR-4644
320	GSK3B	hsa-miR-4647
321	GSK3B	hsa-miR-4659b-3p
322	GSK3B	hsa-miR-4666a-3p
323	GSK3B	hsa-miR-4689
324	GSK3B	hsa-miR-4699-3p
325	GSK3B	hsa-miR-4704-3p
326	GSK3B	hsa-miR-4728-5p
327	GSK3B	hsa-miR-4742-5p
328	GSK3B	hsa-miR-499b-5p
329	GSK3B	hsa-miR-4762-5p
330	GSK3B	hsa-miR-4768-5p
331	GSK3B	hsa-miR-4778-3p
332	GSK3B	hsa-miR-4779
333	GSK3B	hsa-miR-4782-3p
334	GSK3B	hsa-miR-4797-5p
335	GSK3B	hsa-miR-4802-3p
336	GSK3B	hsa-miR-5002-5p
337	GSK3B	hsa-miR-5008-3p
338	GSK3B	hsa-miR-5584-5p
339	GSK3B	hsa-miR-6071
340	GSK3B	hsa-miR-6080
341	GSK3B	hsa-miR-6513-3p
342	GSK3B	hsa-miR-6731-5p
343	GSK3B	hsa-miR-6733-5p
344	GSK3B	hsa-miR-6733-3p
345	GSK3B	hsa-miR-6740-3p
346	GSK3B	hsa-miR-6743-5p
347	GSK3B	hsa-miR-6754-5p
348	GSK3B	hsa-miR-6766-3p
349	GSK3B	hsa-miR-6778-5p
350	GSK3B	hsa-miR-6788-5p
351	GSK3B	hsa-miR-6797-5p
352	GSK3B	hsa-miR-6809-3p
353	GSK3B	hsa-miR-6830-3p
354	GSK3B	hsa-miR-6833-5p
355	GSK3B	hsa-miR-6833-3p
356	GSK3B	hsa-miR-6847-3p
357	GSK3B	hsa-miR-6873-3p
358	GSK3B	hsa-miR-6881-3p
359	GSK3B	hsa-miR-6885-3p
360	GSK3B	hsa-miR-6893-5p
361	GSK3B	hsa-miR-7110-3p
362	GSK3B	hsa-miR-7151-3p
363	GSK3B	hsa-miR-7976
364	GSK3B	hsa-miR-8085
365	GSK3B	hsa-miR-10397-5p
366	GSK3B	hsa-miR-3059-5p
367	HIF1A	hsa-miR-3620-3p
368	HIF1A	hsa-miR-4755-3p
369	HIF1A	hsa-miR-6807-5p
370	HIF1A	hsa-miR-7152-3p
371	HIF1A	hsa-miR-199a-5p
372	HIF1A	hsa-miR-3121-3p
373	HIF1A	hsa-miR-3191-5p
374	HIF1A	hsa-miR-4487
375	HIF1A	hsa-miR-5681b
376	HIF1A	hsa-miR-9851-5p
377	HSPA4	hsa-miR-30c-2-3p
378	HSPA4	hsa-miR-214-5p
379	HSPA4	hsa-miR-887-5p
380	HSPA4	hsa-miR-4710
381	HSPA4	hsa-miR-6788-5p
382	HSPA4	hsa-miR-6826-3p
383	HSPA4	hsa-miR-6832-3p
384	HSPA4	hsa-miR-8085
